# Supplementary material for: Top-down fabrication of colloidal plasmonic MoO3−x nanocrystals via solution chemistry hydrogenation
Source: Royal Society of Chemistry journal article supplement (doi:10.1039/d0cc01015d), 2020-01-01
Supplement: d0cc01015d1.pdf [file d0cc01015d1.pdf]

## Electronic Supporting Information (ESI)

### **Top-down Fabrication of Colloidal Plasmonic MoO<sub>3-x</sub> Nanocrystals via Solution Chemistry Hydrogenation**

Shaopeng Qi<sup>a</sup>, Guoning Liu<sup>a</sup>, Lu Tan<sup>a</sup>, Jinxi Chen<sup>a</sup>, Yongbing Lou<sup>\*a</sup>, and Yixin Zhao<sup>\*b</sup>

<sup>a</sup> School of Chemistry and Chemical Engineering, Jiangsu Key Laboratory for Science and Application of Molecular Ferroelectrics, Jiangsu Engineering Laboratory of Smart Carbon-Rich Materials and Device, Southeast University, Nanjing, 211189, China.

<sup>b</sup> School of Environmental Science and Engineering, Shanghai Jiao Tong University, Shanghai, 200240, China.

## Materials

Ethanol, polyvinylpyrrolidone K30 (PVP), glacial acetic acid, and n-hexane were obtained from Sinopharm Chemical Reagent Co. Ltd. Nitromethylpyrrolidone (NMP), molybdic acid ( $\text{H}_2\text{MoO}_4$ ,  $\geq 99.95\%$  trace metals basis), and OAm (80 ~ 90%) were bought from Aladdin. OA (90%) and  $\text{MoO}_3$  (99.9%) were purchased from Sigma–Aldrich and Maya Reagent, respectively. All reagents were directly used as received without further purification.

## Preparations of $\alpha\text{-MoO}_{3-x}$ and $\text{h-MoO}_{3-x}$ nanocrystals

In a typical synthesis, 2 mmol  $\text{MoO}_3$  or  $\text{H}_2\text{MoO}_4$  power was added into 6 mL mixture solvent of OAm:OA (OAm:OA = 0:6, 2:4, 2.5:3.5, 3:3, and 6:0) placed in a 100 mL round-bottom flask. The above mixture was first vigorously stirred for 10 min and then rapidly heated to 120 °C for 20 min under vacuum. Then the mixture was quickly heated to 180 °C by sufficient stirring under  $\text{N}_2$  atmosphere and kept at this temperature for 1 - 12 h. After  $\text{N}_2$ -cooling to ambient temperature, the black product was washed with a mixture of n-hexane and ethanol three times and then dried in vacuum at 60 °C for 2 h.

## Ligand Exchange Procedure

The as-prepared samples were added into glacial acetic acid (50 mL) placed in a 100 mL flask. The suspension was constantly stirred for 6 h at 70 °C under  $\text{N}_2$  and then centrifuged, and the obtained precipitate was dispersed in n-hexane by ultrasonication and subsequently added into PVP aqueous solution (1.5 g PVP dissolved in 10 mL distilled water) under magnetic stirring for 2 h. The products were centrifuged and washed (three times) with distilled water, and then dried at 50 °C and collected (called

hydrophilic MoO<sub>3-x</sub>). These water-soluble products were used for the photo-thermal conversion experiments.

### Characterizations

The X-ray diffractor (Ultima IV, Cu Ka radiation, scanning rate: 20° min<sup>-1</sup>) was used to investigate the crystallographic structures of the prepared samples. The Vis-NIR absorption spectra of samples (dispersed in NMP) were measured on a UV-3600 spectrophotometer (Shimadzu). The morphologies of the samples were investigated by transmission electron microscope (JEOL JEM-2010, 200 kV). X-ray photoelectron spectroscopy (XPS) spectra were recorded with a Thermo Scientific Escalab 250 Xi. Raman measurements were carried out using Thermo Fisher (laser wavelength: 532 nm).

### Calculation of the photothermal conversion efficiency

The photothermal conversion efficiencies ( $\eta$ ) of the  $\alpha$ -MoO<sub>3-x</sub> and h-MoO<sub>3-x</sub> were calculated by equation (1) as the previous reports.<sup>1</sup>

$$\eta = \frac{hS(\Delta T_{max,mix} - \Delta T_{max,H2O})}{I(1 - 10^{-A_{808}})} \quad (1)$$

Where h was heat transfer coefficient and S was the surface area of the container.  $\Delta T_{max,mix}$  was the temperature change of the MoO<sub>3-x</sub> aqueous suspension (100  $\mu$ g mL<sup>-1</sup>) at the maximum steady-state temperature and  $\Delta T_{max,H2O}$  was the temperature change of water at the maximum steady-state temperature. I was the laser power (5 W cm<sup>-2</sup>).  $A_{808}$  was the absorbance of MoO<sub>3-x</sub> aqueous solution at 808 nm.

The value of hS could be acquired from equation (2).

$$hS = \frac{\sum_i m_i C_{p,i}}{\tau S} \quad (2)$$

The m and C<sub>p</sub> are the mass and heat capacity of solvent (water). In this work, m =

1.8 g,  $C_p = 4.2 \text{ J g}^{-1} \text{ }^\circ\text{C}^{-1}$ , and  $\tau_s = 128.70$  ( $\alpha\text{-MoO}_{3-x}$ ) and  $125.96$  s ( $\text{h-MoO}_{3-x}$ ) (Fig. S8). The hS values of  $\alpha\text{-MoO}_{3-x}$  and  $\text{h-MoO}_{3-x}$  were determined to be  $59.91$  and  $61.22 \text{ mW }^\circ\text{C}^{-1}$ . I was  $5000 \text{ mW}$ . For  $\alpha\text{-MoO}_{3-x}$  and  $\text{h-MoO}_{3-x}$ ,  $A_{808} = 1.77$  and  $1.48$ . The values of  $\Delta T_{\text{max,mix}}$  were  $43.6$  and  $43$   $^\circ\text{C}$  for  $\alpha\text{-MoO}_{3-x}$  and  $\text{h-MoO}_{3-x}$ .  $\Delta T_{\text{max,H}_2\text{O}}$  was  $5$   $^\circ\text{C}$ . Therefore, the photothermal conversion efficiencies ( $\eta$ ) were calculated to be  $47.1$  and  $48.1\%$ .

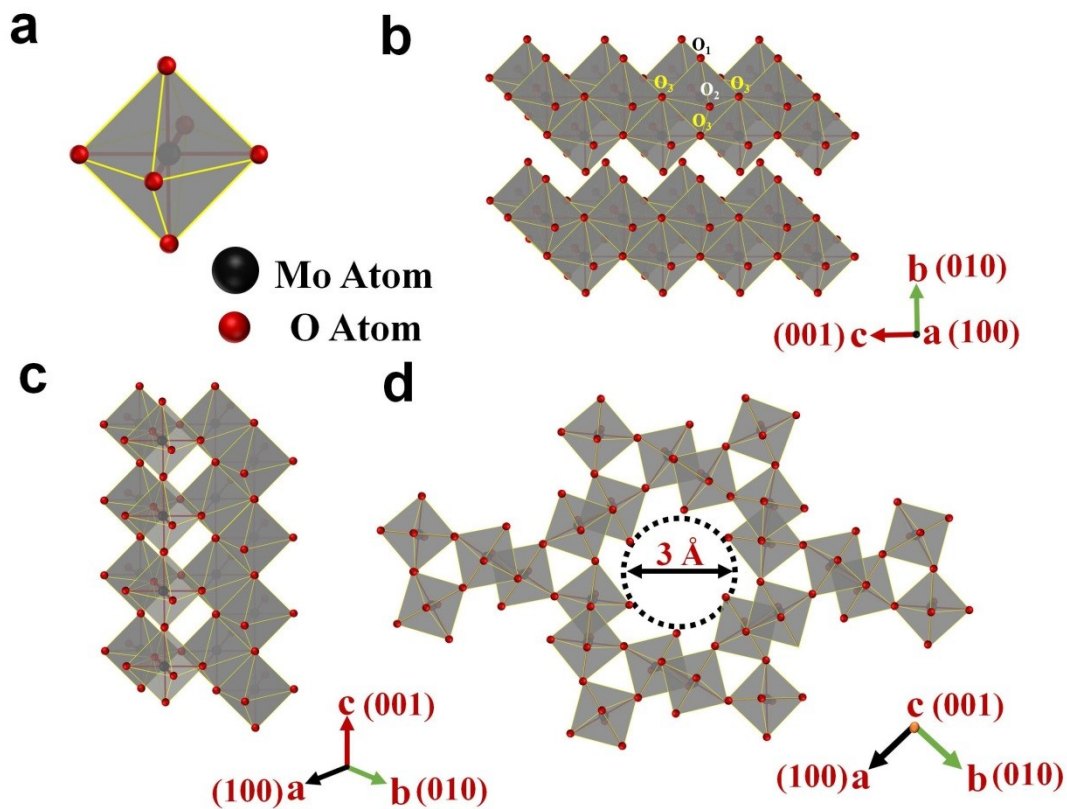

**Fig. S1.** (a) MoO<sub>6</sub> octahedron building unit, (b) stable  $\alpha$ -MoO<sub>3</sub> with layered structure, (c) metastable h-MoO<sub>3</sub>, and (d) one-dimensional tunnel structure along the c-axis of h-MoO<sub>3</sub>.

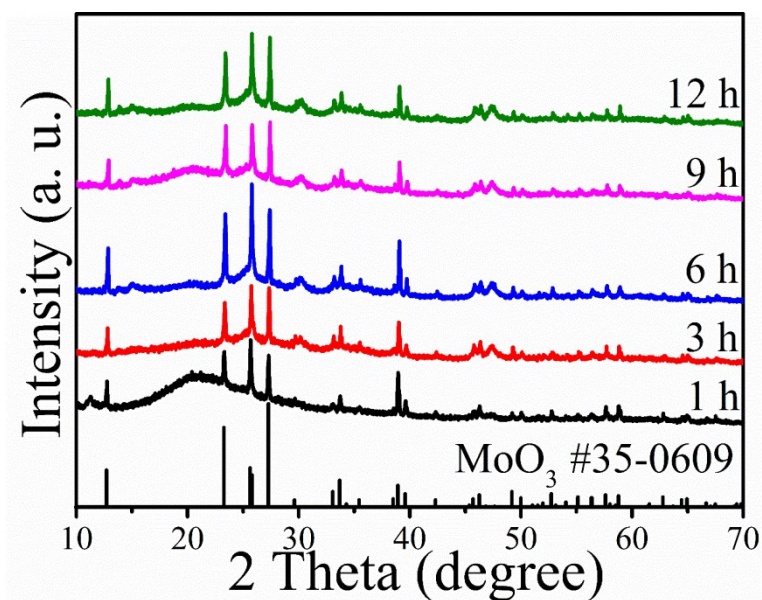

**Fig. S2.** XRD patterns of  $\alpha$ -MoO<sub>3-x</sub> nanocrystals treated by OAm and OA (OAm:OA = 2.5:3.5). The time labeled on each curve indicated the corresponding reaction time.

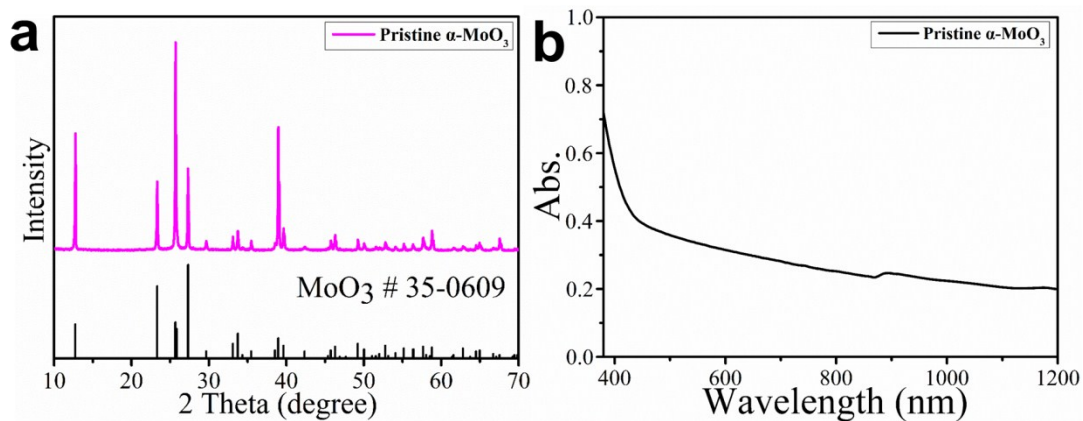

**Fig. S3.** (a) XRD pattern and (b) optical absorption of pristine  $\alpha$ -MoO<sub>3</sub>.

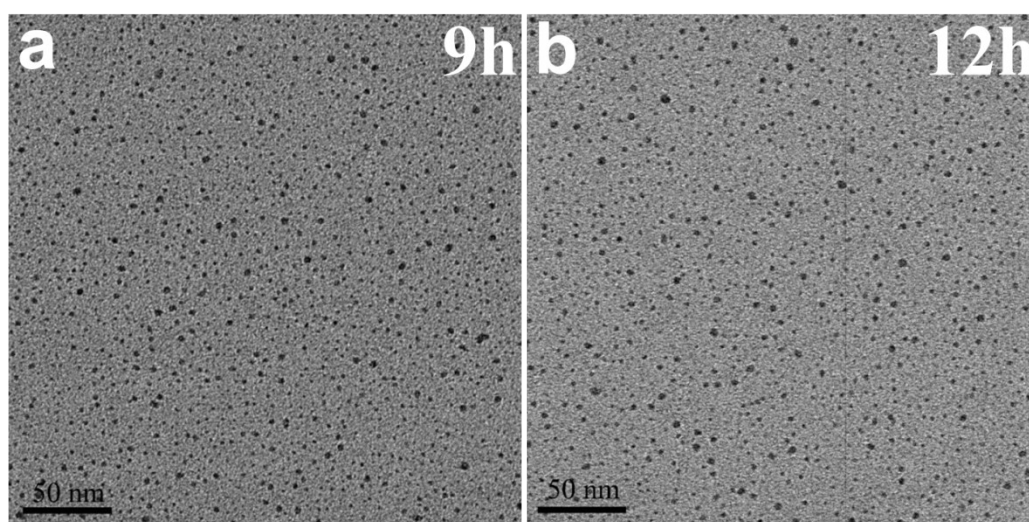

**Fig. S4.** TEM images of  $\alpha$ -MoO<sub>3</sub> treated by using ratio of OAm:OA = 2.5:3.5. The time labeled above the images indicated the corresponding reaction time.

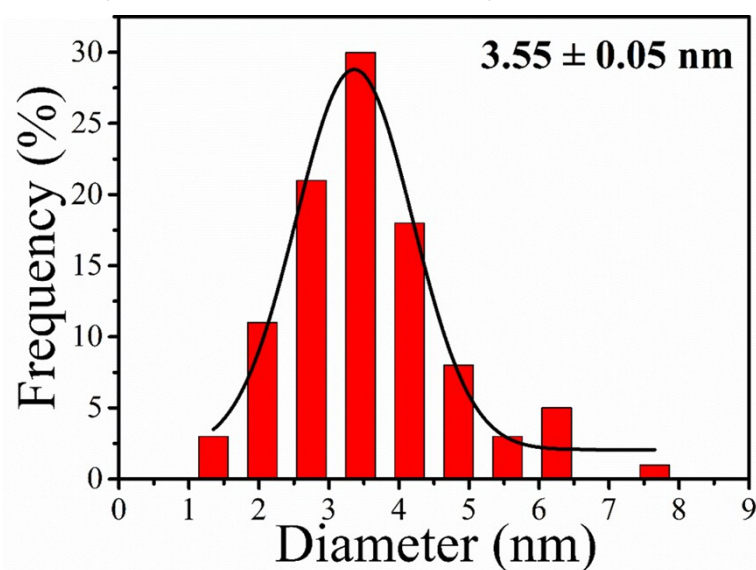

**Fig. S5.** Size distribution histograms of  $\alpha$ -MoO<sub>3-x</sub> NPs obtained with different OAm:OA ratios of 2.5:3.5. (N = 500)

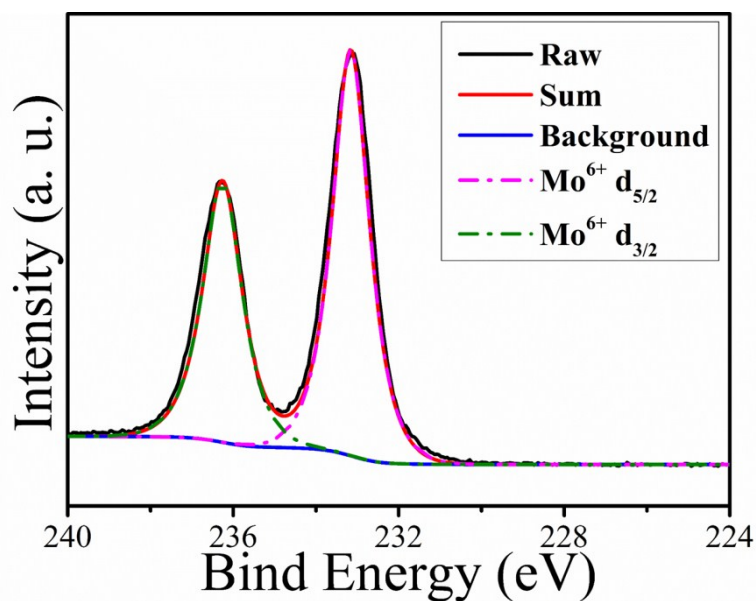

Fig. S6. Mo 3d XPS spectrum of pristine  $\alpha$ -MoO<sub>3</sub>.

$\alpha$ -MoO<sub>3</sub> treated by different combinations of OAm and OA

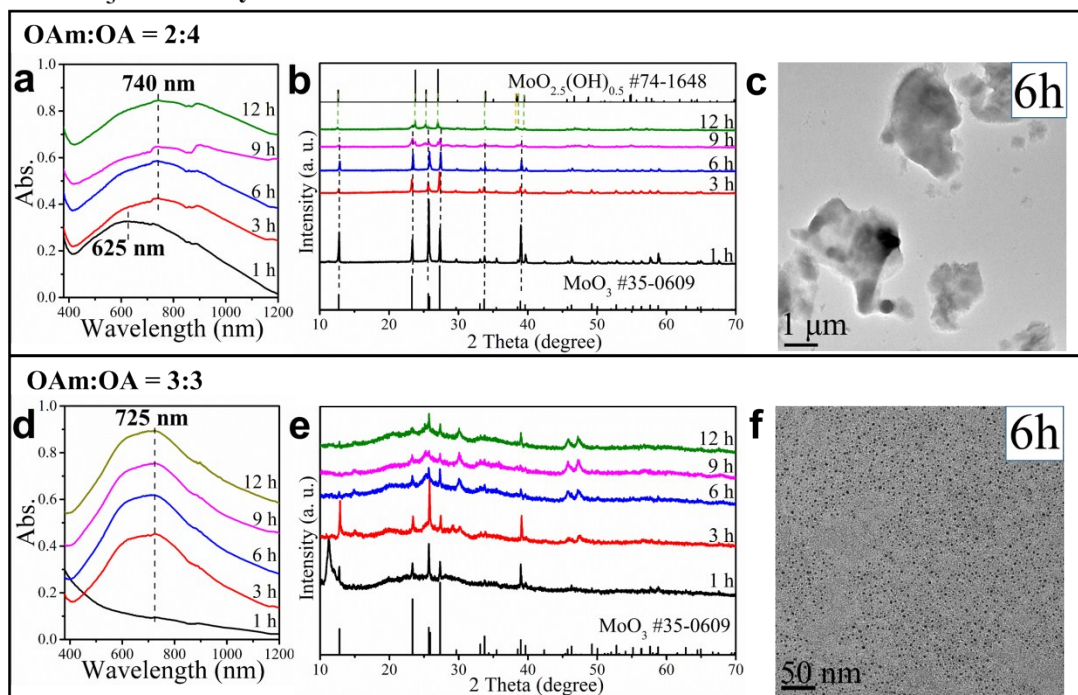

Fig. S7. The TEM images and evolutions of Vis-NIR spectra and XRD patterns of  $\alpha$ -MoO<sub>3</sub> nanocrystals treated by different OAm:OA mixtures. The time labeled on each curve indicated the corresponding reaction time.

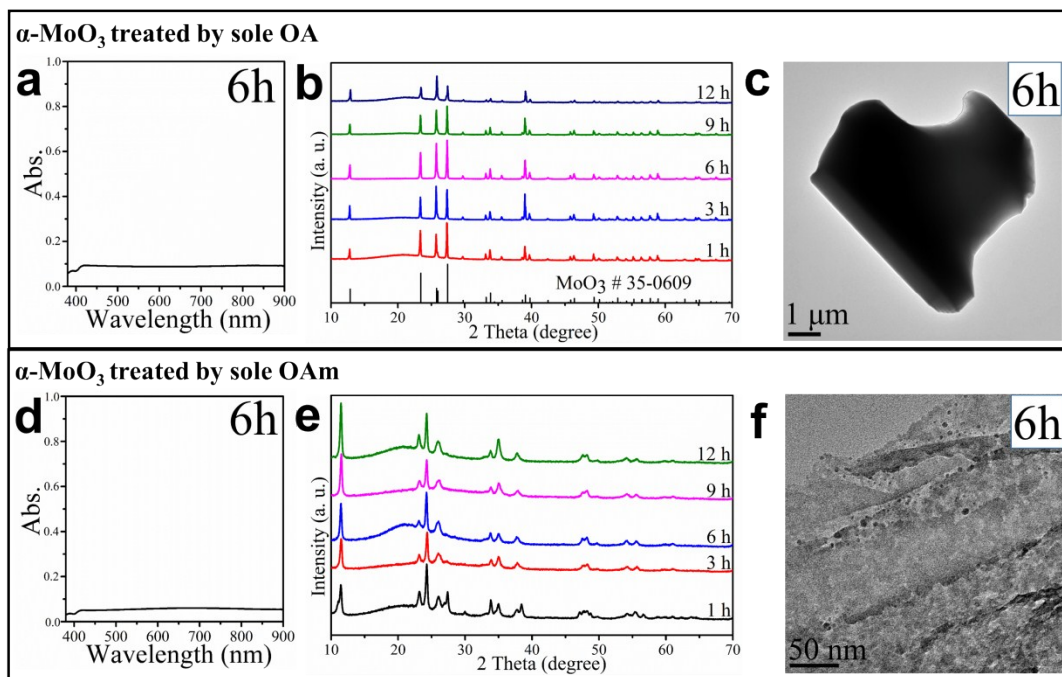

**Fig. S8.** The Vis-NIR spectra, TEM images, and evolutions of XRD patterns of  $\alpha$ - $\text{MoO}_3$  nanocrystals treated by sole OA and sole OAm. The time labeled on each curve indicated the corresponding reaction time.

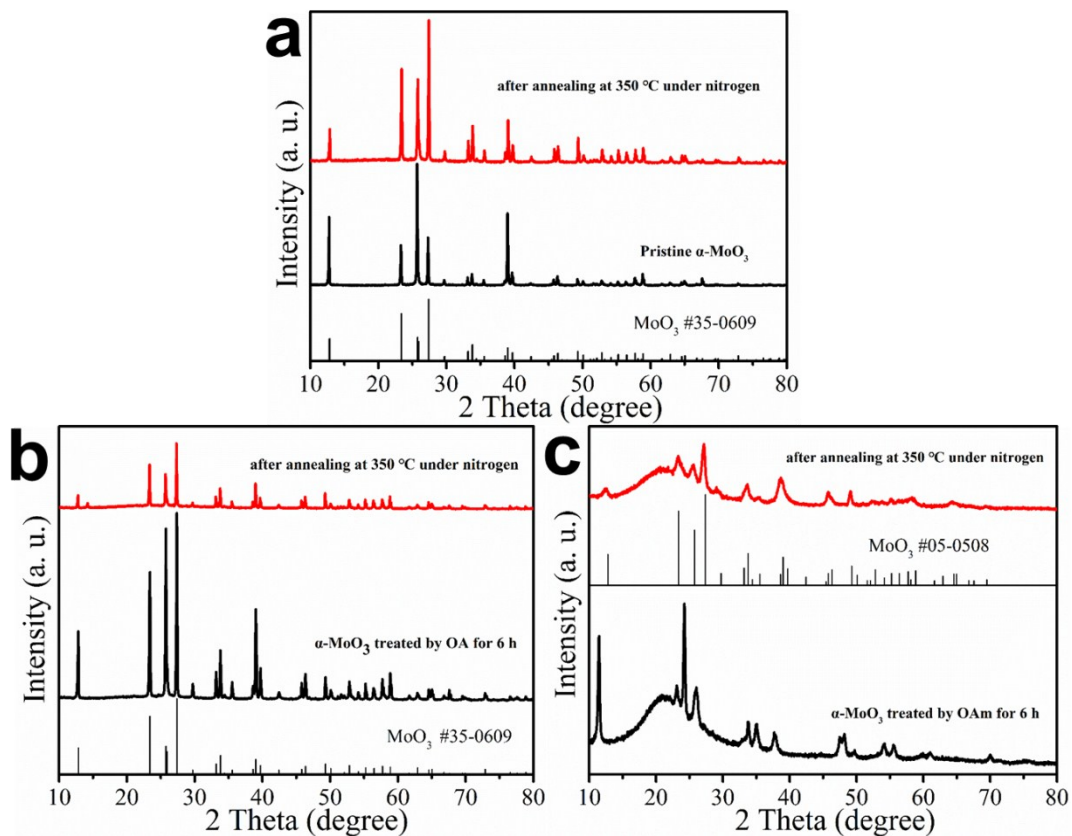

**Fig. S9.** XRD diffraction patterns of (180  $^\circ\text{C}$  for 6 h) before and after annealing (a) pristine  $\alpha$ - $\text{MoO}_3$ , (b) OA treated  $\alpha$ - $\text{MoO}_3$ , and (c) OAm treated  $\alpha$ - $\text{MoO}_3$ .



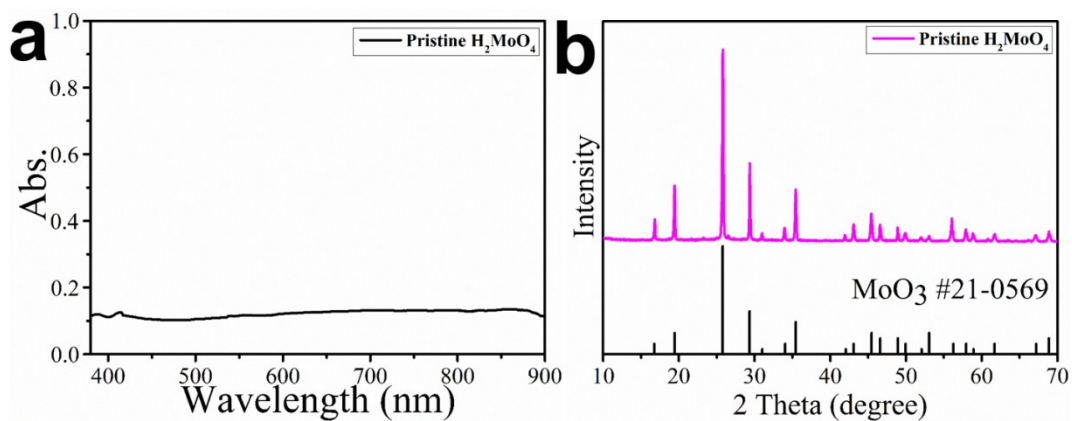

**Fig. S10.** (a) optical absorption and (b) XRD pattern of pristine h- $\text{MoO}_3$ .

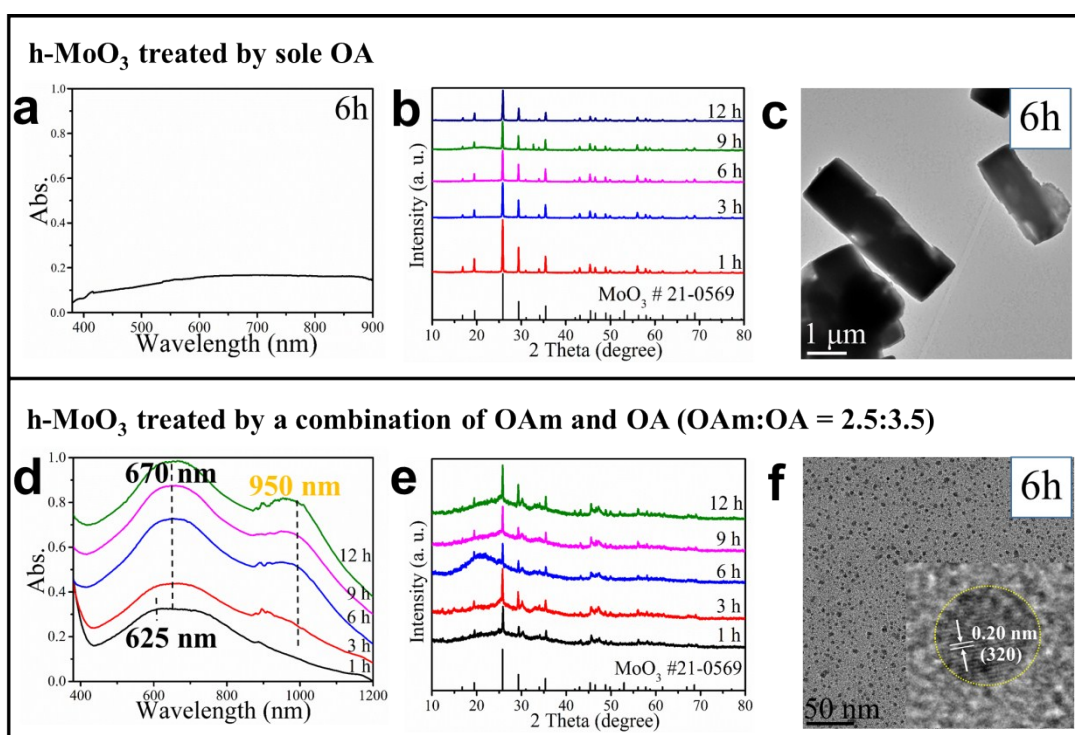

**Fig. S11.** The evolutions of Vis-NIR spectra, XRD patterns, TEM images and of h- $\text{MoO}_3$  nanocrystals treated by sole OA and a combination of OAm and OA. The time labeled on each curve indicated the corresponding reaction time.

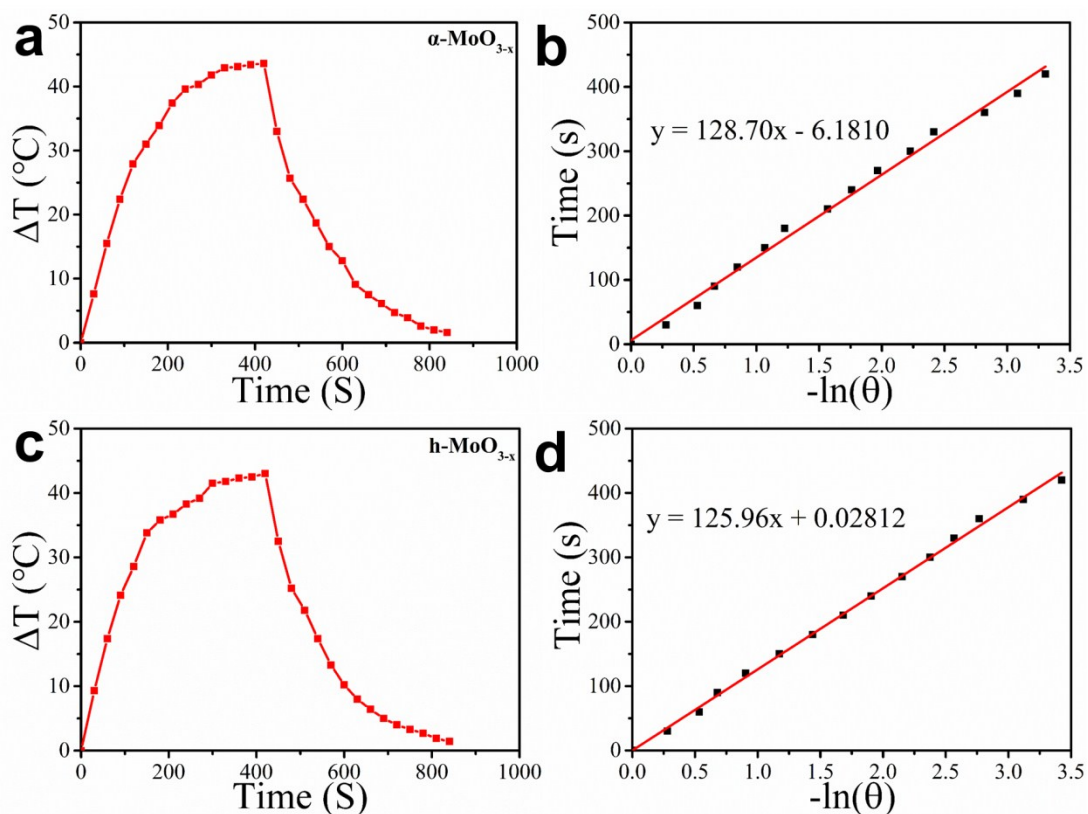

**Fig. S12.** Photothermal effects of the irradiations of the  $\alpha$ -MoO<sub>3-x</sub> (a) and h-MoO<sub>3-x</sub> (c) aqueous dispersions with the NIR laser (808 nm, 5 W cm<sup>-2</sup>), in which the irradiation lasted for 7 min, and then the laser was shut off. Time constants for heat transfer from the system were determined to be  $\tau_s = 128.70$  s (b) and 125.96 s (d) by applying the linear time data from the cooling period versus  $-\ln(\theta)$  of driving force temperature.

## References

- (1) Ren, W.; Yan, Y.; Zeng, L.; Shi, Z.; Gong, A.; Schaaf, P.; Wang, D.; Zhao, J.; Zou, B.; Yu, H.; Chen, G.; Brown, E. M. B.; Wu, A. *Adv. Healthcare Mater.* 2015, **4**, 1526-1536.
